# Supplementary material
Source: Springer Nature journal article supplement (https://www.springermedizin.de/resource/supplementary/12960_2008_124_MOESM1_ESM.pdf/9570466)
Supplement: MOESM1 [file 9570466]

# MSH/RPM Plus

University of  
Nairobi

Makerere  
University, Uganda

Muhimbili University  
of Health and Allied  
Sciences, Tanzania

The National  
University of  
Rwanda

## Activities:

- Conduct assessments of HIVAIDS pharmaceutical management systems
- Develop and implement HIVAIDS pharmaceutical management training programs
- Implement innovative skills building interventions for pharmaceutical management
- Contribute to country Global Fund proposals
- Contribute to country initiatives to improve adherence to antiretroviral therapy
- Develop new pharmacy curricula that include pharmaceutical supply management
